# Supplementary material for: Comparative Study of Outcomes among Patients with Polycystic Kidney Disease on Hemodialysis and Peritoneal Dialysis
Source: PubMed Central journal article supplement (PMC4526846; doi:10.1038/srep12816), 2015-08-06

# **Comparative Study of Outcomes among Patients with Polycystic Kidney**

## **Disease on Hemodialysis and Peritoneal Dialysis**

Ju-Yeh Yang<sup>1</sup>, Likwang Chen<sup>2</sup>, Chia-Ter Chao<sup>3</sup>, Yu-Sen Peng<sup>1</sup>, Chih-Kang Chiang<sup>3</sup>,

Tze-Wah Kao<sup>3</sup>, Kuo-Liong Chien<sup>4,5,6</sup>, Hon-Yen Wu<sup>1,5</sup>, Jenq-Wen Huang<sup>\*3</sup>, Kuan-Yu

Hung<sup>3</sup>

### **Appendix**

**Appendix 1. The logistic regression model to calculate the probability of receiving PD.**

| Parameter |   | DF | Estimate | Standard Error | Wald Chi-Square | Pr > ChiSq |
|-----------|---|----|----------|----------------|-----------------|------------|
| Intercept |   | 1  | -0.0493  | 0.5784         | 0.0073          | 0.9320     |
| ID_SEX    | F | 1  | 0.4885   | 0.2007         | 5.9249          | 0.0149     |
| Age       |   | 1  | -0.0289  | 0.00793        | 13.2613         | 0.0003     |
| economic  | 0 | 1  | -0.5228  | 0.4287         | 1.4876          | 0.2226     |
| economic  | 1 | 1  | -0.6075  | 0.4111         | 2.1842          | 0.1394     |
| DM        |   | 1  | -0.2822  | 0.3030         | 0.8677          | 0.3516     |
| HF        |   | 1  | -0.1423  | 0.3431         | 0.1721          | 0.6782     |
| CAD       |   | 1  | -0.0396  | 0.2929         | 0.0182          | 0.8926     |
| COPD      |   | 1  | -0.7893  | 0.5293         | 2.2237          | 0.1359     |
| CVD       |   | 1  | -0.8755  | 0.5272         | 2.7577          | 0.0968     |
| Cancer    |   | 1  | -0.6796  | 0.5291         | 1.6497          | 0.1990     |
| HTN       |   | 1  | -0.4355  | 0.2205         | 3.9003          | 0.0483     |
| Arrhy     |   | 1  | 0.0834   | 0.4059         | 0.0423          | 0.8371     |
| VHD       |   | 1  | -0.3148  | 0.5431         | 0.3360          | 0.5621     |
| PVD       |   | 1  | -13.7222 | 561.8          | 0.0006          | 0.9805     |
| Liver     |   | 1  | 0.1362   | 0.2695         | 0.2552          | 0.6134     |
| Lipid     |   | 1  | 0.4844   | 0.2823         | 2.9439          | 0.0862     |
| Gout      |   | 1  | 0.4971   | 0.2155         | 5.3196          | 0.0211     |

## Appendix 2. Standardized differences in the unmatched opulation

|          | Mean in treated | Mean in Untreated | Standardised diff. |
|----------|-----------------|-------------------|--------------------|
| Age      | 53.56           | 60.27             | -0.466             |
| sex      | 0.50            | 0.59              | -0.169             |
| economic | 0.74            | 0.70              | 0.073              |
| dm       | 0.12            | 0.18              | -0.169             |
| hf       | 0.10            | 0.18              | -0.234             |
| cad      | 0.14            | 0.21              | -0.180             |
| copd     | 0.03            | 0.10              | -0.288             |
| cvd      | 0.03            | 0.09              | -0.256             |
| Cancer   | 0.03            | 0.07              | -0.181             |
| htn      | 0.70            | 0.81              | -0.259             |
| Arrhy    | 0.06            | 0.09              | -0.097             |
| vhd      | 0.03            | 0.06              | -0.148             |
| pvd      | 0.00            | 0.03              | -0.253             |
| Liver    | 0.15            | 0.14              | 0.025              |
| Lipid    | 0.15            | 0.12              | 0.103              |
| Gout     | 0.34            | 0.29              | 0.097              |

### Appendix 3. Standardized differences in the matched population

|          | Mean in treated | Mean in Untreated | Standardised diff. |
|----------|-----------------|-------------------|--------------------|
| Age      | 53.97           | 54.01             | -0.003             |
| sex      | 0.51            | 0.53              | -0.049             |
| economic | 0.73            | 0.74              | -0.021             |
| dm       | 0.12            | 0.11              | 0.051              |
| hf       | 0.10            | 0.11              | -0.040             |
| cad      | 0.15            | 0.16              | -0.034             |
| copd     | 0.03            | 0.04              | -0.022             |
| cvd      | 0.03            | 0.02              | 0.049              |
| Cancer   | 0.03            | 0.03              | 0.000              |
| htn      | 0.70            | 0.70              | -0.000             |
| Arrhy    | 0.07            | 0.07              | 0.000              |
| vhd      | 0.03            | 0.05              | -0.083             |
| pvd      | 0.00            | 0.00              | .                  |
| Liver    | 0.16            | 0.14              | 0.058              |
| Lipid    | 0.14            | 0.12              | 0.061              |
| Gout     | 0.34            | 0.36              | -0.060             |

**Appendix 4. The ROC curve for the logistic regression model to calculate propensity score.**

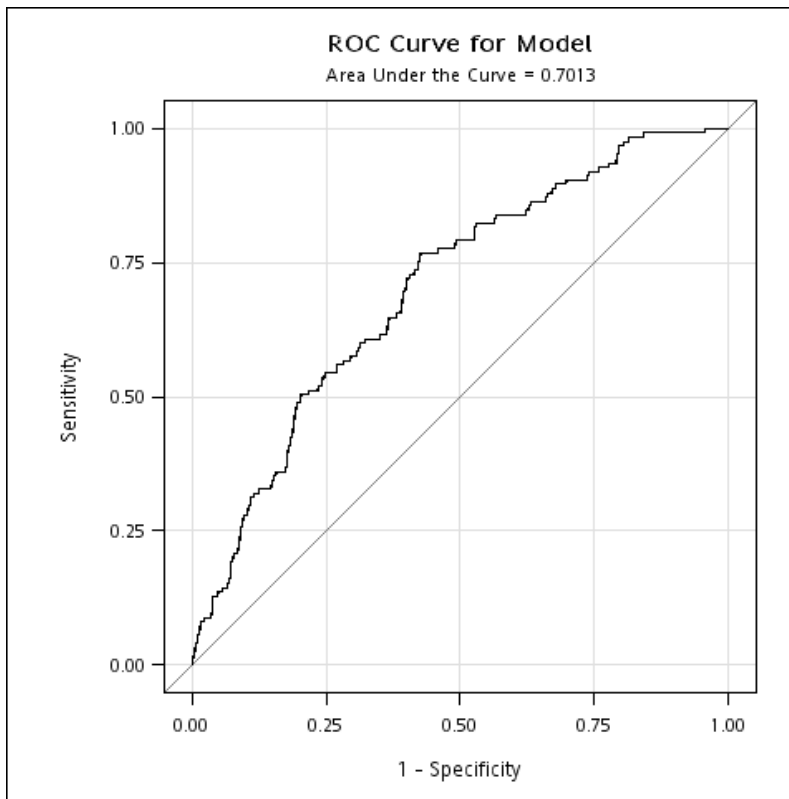

**Appendix 5. Survival curves between the patients with polycystic kidney disease on peritoneal dialysis and hemodialysis, considering renal transplantation as a competing event**

Panel A Intention to treat (Substantial hazard ratio for death: 0.86 (0.49-1.52),  $p=0.6$ )

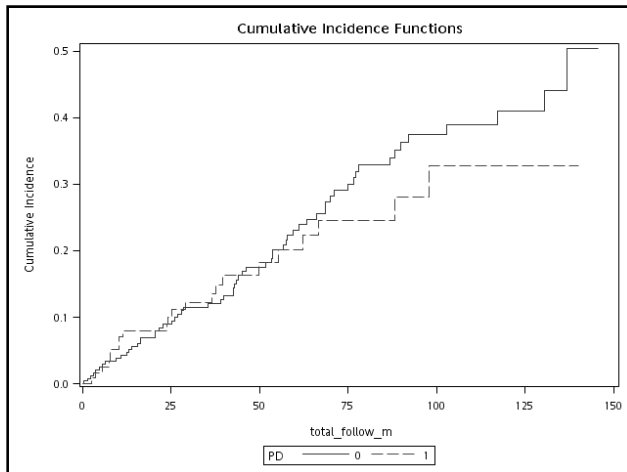

Panel B Modality switch as censor (Substantial hazard ratio for death: 0.98 (0.53-1.80),  $p=0.94$ )

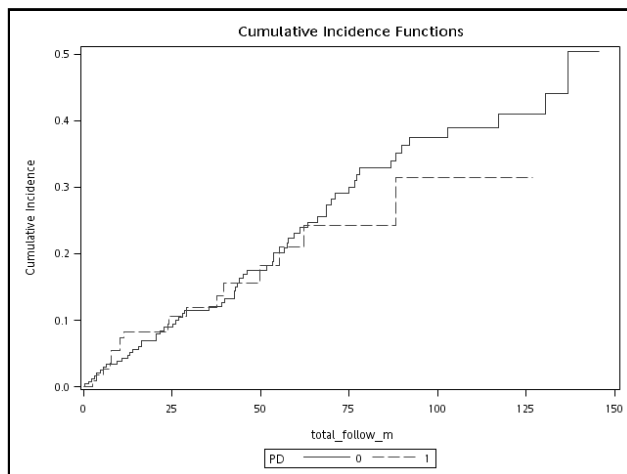

**Appendix 6. Survival curves regarding the incidence of a first episode of hospitalization among the patients with polycystic kidney disease on peritoneal dialysis and hemodialysis, considering renal transplantation as a competing event**

Panel A Intention to treat (Substantial hazard ratio for hospitalization: 1.46 (1.14-1.89),  $p=0.003$ ))

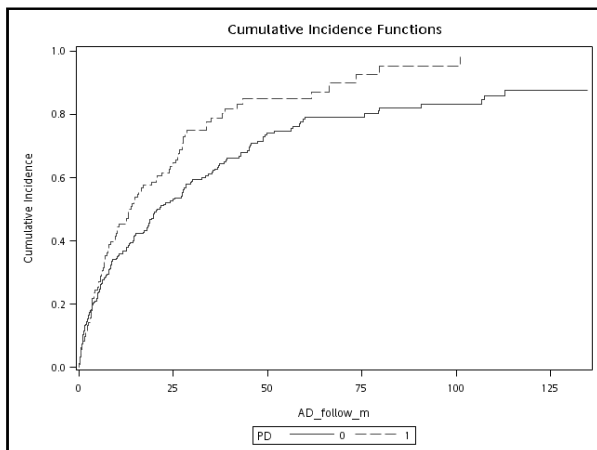

Panel B Modality switch as censor (Substantial hazard ratio for death: 1.42 (1.10-1.83),  $p=0.008$ ))

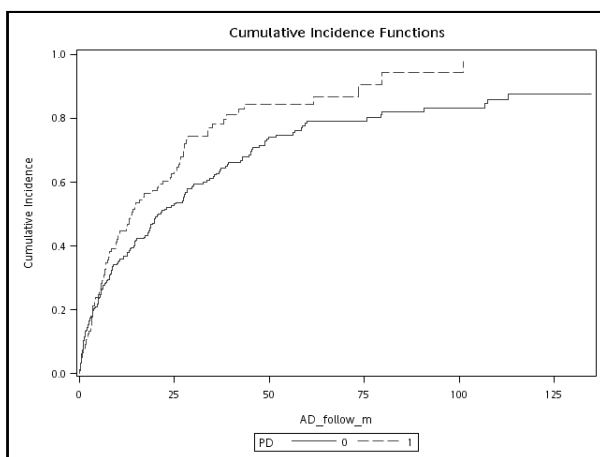

Supplement: srep12816-s1.pdf [file srep12816-s1.pdf]
